# Supplementary material for: Degradation of the transition metal@Pt core–shell nanoparticle catalyst: a DFT study
Source: Royal Society of Chemistry journal article supplement (doi:10.1039/d0cp00888e), 2020-01-01
Supplement: d0cp00888e1.pdf [file d0cp00888e1.pdf]

# **The degradation of transition metal@Pt core-shell nanoparticle catalyst: A DFT study**

Lu Li<sup>1,2</sup>, Hong xin Ma<sup>1,3</sup>, Xiao dong Jian<sup>4</sup>, Ping Qian<sup>1,2\*</sup>, Yan jing  
Su<sup>1,3\*</sup>

<sup>1</sup> Beijing Advanced Innovation Center for Materials Genome Engineering, University of  
Science and Technology Beijing, Beijing, China

<sup>2</sup> Department of Physics, University of Science and Technology Beijing, Beijing, China

<sup>3</sup> Corrosion and Protection Center, University of Science and Technology Beijing, Beijing,  
China

<sup>4</sup> National Supercomputer Center in Tianjin, Tianjin, China

## Supplementary Information

**Table S1. Spin states of ICO structure M@Pt core-shell nanoparticles.  $M_{Pt}$  represents the average spin moments of Pt atoms,  $M_c$  represents the average spin moments of core atoms,  $M_t$  represents the total spin moments of M@Pt nanoparticles, and N represents the total number of atoms in M@Pt nanoparticles.**

|       | $M_{Pt}$ ( $\mu_B$ /atom) | $M_c$ ( $\mu_B$ /atom) | $M_t$ ( $\mu_B$ ) | N   |
|-------|---------------------------|------------------------|-------------------|-----|
| Fe@Pt | 0.24                      | 2.94                   | 183.78            | 147 |
| Co@Pt | 0.19                      | 1.89                   | 121.43            | 147 |
| Ni@Pt | 0.17                      | 0.86                   | 62.94             | 147 |
| Cu@Pt | 0                         | 0                      | 0                 | 147 |
| Ru@Pt | 0                         | 0                      | 0                 | 147 |
| Rh@Pt | 0                         | 0                      | 0                 | 147 |
| Pd@Pt | 0.25                      | 0.53                   | 52.15             | 147 |
| Ag@Pt | 0                         | 0                      | 0                 | 147 |
| Os@Pt | 0                         | 0                      | 0                 | 147 |
| Ir@Pt | 0                         | 0                      | 0                 | 147 |
| Pt@Pt | 0                         | 0                      | 0                 | 147 |
| Au@Pt | 0                         | 0                      | 0                 | 147 |

**Table S2. Spin states of Cubo structure M@Pt core-shell nanoparticles.  $M_{Pt}$  represents the average spin moments of Pt atoms,  $M_c$  represents the average spin moments of core atoms,  $M_t$  represents the total spin moments of M@Pt nanoparticles, and N represents the total number of atoms in M@Pt nanoparticles.**

|       | $M_{Pt}$ ( $\mu_B$ /atom) | $M_c$ ( $\mu_B$ /atom) | $M_t$ ( $\mu_B$ ) | N   |
|-------|---------------------------|------------------------|-------------------|-----|
| Fe@Pt | 0.25                      | 2.82                   | 178.10            | 147 |
| Co@Pt | 0.17                      | 1.89                   | 119.59            | 147 |
| Ni@Pt | 0.16                      | 0.77                   | 57.07             | 147 |
| Cu@Pt | 0                         | 0                      | 0                 | 147 |
| Ru@Pt | 0                         | 0                      | 0                 | 147 |
| Rh@Pt | 0                         | 0                      | 0                 | 147 |
| Pd@Pt | 0.26                      | 0.43                   | 47.57             | 147 |
| Ag@Pt | 0                         | 0                      | 0                 | 147 |
| Os@Pt | 0                         | 0                      | 0                 | 147 |
| Ir@Pt | 0                         | 0                      | 0                 | 147 |
| Pt@Pt | 0                         | 0                      | 0                 | 147 |
| Au@Pt | 0                         | 0                      | 0                 | 147 |

**Table S3. Spin states of TCO structure M@Pt core-shell nanoparticles.  $M_{Pt}$  represents the average spin moments of Pt atoms,  $M_c$  represents the average spin moments of core atoms,  $M_t$  represents the total spin moments of M@Pt nanoparticles, and N represents the total number of atoms in M@Pt nanoparticles.**

|       | $M_{Pt}$ ( $\mu_B$ /atom) | $M_c$ ( $\mu_B$ /atom) | $M_t$ ( $\mu_B$ ) | N   |
|-------|---------------------------|------------------------|-------------------|-----|
| Fe@Pt | 0.21                      | 2.84                   | 249.98            | 201 |
| Co@Pt | 0.13                      | 1.85                   | 162.01            | 201 |
| Ni@Pt | 0.13                      | 0.81                   | 79.85             | 201 |
| Cu@Pt | 0                         | 0                      | 0                 | 201 |
| Ru@Pt | 0                         | 0                      | 0                 | 201 |
| Rh@Pt | 0                         | 0                      | 0                 | 201 |
| Pd@Pt | 0.06                      | 0.16                   | 19.96             | 201 |
| Ag@Pt | 0                         | 0                      | 0                 | 201 |
| Os@Pt | 0                         | 0                      | 0                 | 201 |
| Ir@Pt | 0                         | 0                      | 0                 | 201 |
| Pt@Pt | 0                         | 0                      | 0                 | 201 |
| Au@Pt | 0                         | 0                      | 0                 | 201 |

## The specific coordinates of the optimized core-shell nanoparticle models

POSCAR of ICO-structure Ir@Pt core-shell nanoparticle

```
1.0000000000000000
30.0000000000000000 0.0000000000000000 0.0000000000000000
0.0000000000000000 30.0000000000000000 0.0000000000000000
0.0000000000000000 0.0000000000000000 30.0000000000000000
Pt Ir
92 55
Direct
0.4285079510095455 0.2801701943544021 0.3843875992507635
0.4750923421661178 0.4231700969774194 0.2839469176158195
0.4513991191559373 0.3505954021979327 0.3311341708586982
0.3861046618239221 0.3031009579438159 0.4618499115137214
0.4763532847615396 0.2737334623415765 0.4618418086075031
0.3706337440175105 0.3506164747535072 0.3810540777235618
0.2775188535455942 0.4525836092086163 0.4618620198156170
0.3428913814879205 0.5000026089990570 0.3311238890648732
0.3178978476866995 0.4231883710783367 0.3810893311367081
0.3263404628683505 0.3738996288228220 0.4590336182536094
0.3926629029356242 0.4220451635724397 0.3263836005498198
0.5001040294740260 0.4999804456104321 0.2415530631011888
0.6869896170054818 0.3640955667032448 0.3844493426329073
0.5654069326576284 0.4525275984747809 0.2839970378280616
0.5167557058064258 0.3031185952560674 0.3810227097738277
0.6924852465852693 0.4551295501535351 0.3811084872383965
0.6021100780142636 0.3308279044579162 0.3810413988606334
0.6271373451872523 0.4076818266638236 0.3311634111547861
0.7078875002405772 0.4076173813219204 0.4618691184037382
0.6520249048189070 0.3308251126422690 0.4618371586868512
0.6326695945771583 0.5000122024682923 0.3263908182955197
0.5409904399325276 0.3738800248140443 0.3263673903067503
0.5662695066142807 0.2958871386965883 0.4589598925091212
0.2688065352856619 0.5000119778283156 0.3844111212782874
0.4285546835752278 0.7198270523719983 0.3843448283102752
0.4192588547393775 0.4999844268448501 0.2839345011252910
0.4751407061422758 0.5768179964209610 0.2839357378388789
0.4764003523705803 0.7262657157899453 0.4618201289400554
0.4514461121052832 0.6493891265706614 0.3311046090389528
0.3179252708044278 0.5768271075121328 0.3810501356878634
0.3706824629293433 0.6493837652189403 0.3809974329383286
0.2775311365442275 0.5474758606230613 0.4618243566507449
0.3861516373535931 0.6969150847901904 0.4618112563657212
```

|                    |                    |                    |
|--------------------|--------------------|--------------------|
| 0.3926964691966363 | 0.5779307882950389 | 0.3263430433977822 |
| 0.3263784899213911 | 0.6261353884028042 | 0.4589921039733430 |
| 0.6870225553063050 | 0.6359005093927029 | 0.3844866446436718 |
| 0.6271459216331420 | 0.5923467392193106 | 0.3311686800886903 |
| 0.5654164215550082 | 0.5474779955332750 | 0.2839913941908020 |
| 0.6520960827403700 | 0.6691304294099922 | 0.4618992977822883 |
| 0.7079303137028692 | 0.5923255809570633 | 0.4618817960142025 |
| 0.6021499359009773 | 0.6691831040643016 | 0.3810881841749687 |
| 0.6924872304925704 | 0.5448677808064175 | 0.3811157998941664 |
| 0.5168028880680791 | 0.6968960733521625 | 0.3810394887126503 |
| 0.5410218686382334 | 0.6261367727611872 | 0.3263736389116254 |
| 0.5663215113307212 | 0.7040953650277213 | 0.4590004844220438 |
| 0.7146406127471445 | 0.4999692648794103 | 0.4590277118935991 |
| 0.3130089957978243 | 0.3640964846404652 | 0.6155865051283504 |
| 0.3728832965314352 | 0.4076624849783053 | 0.6688758635497015 |
| 0.4346079172646128 | 0.4525429551476083 | 0.7160322616731484 |
| 0.3479236051970456 | 0.3308566721332148 | 0.5381637746604354 |
| 0.2920939119443128 | 0.4076728321793650 | 0.5381928378386355 |
| 0.3978785425992097 | 0.3308090928480288 | 0.6189645492722671 |
| 0.3075385341362628 | 0.4551329700758440 | 0.6189579111074425 |
| 0.4832245160978018 | 0.3030979579674657 | 0.6189749935267610 |
| 0.4590019008823032 | 0.3738605414549004 | 0.6736544021516351 |
| 0.3673533469410338 | 0.5000125420342998 | 0.6736492126869592 |
| 0.4336855742578027 | 0.2958965196962351 | 0.5410320571407125 |
| 0.7311782036513099 | 0.4999511261018832 | 0.6156493595957618 |
| 0.5714619424273358 | 0.2801434677836988 | 0.6155995286026842 |
| 0.5807347511017638 | 0.4999890854380606 | 0.7160848190169847 |
| 0.5248763910801552 | 0.4231766718556632 | 0.7160864011072761 |
| 0.5235984201142273 | 0.2737317535399794 | 0.5381594868910968 |
| 0.5485742839440716 | 0.3505805076456797 | 0.6688880187359247 |
| 0.6820710624354057 | 0.4231431701741804 | 0.6189530051530119 |
| 0.6293217884738357 | 0.3505941496054087 | 0.6189772059243400 |
| 0.7224674605053713 | 0.4525059817750962 | 0.5382081297821381 |
| 0.6138428488030440 | 0.3030734419114280 | 0.5381368804897988 |
| 0.6073091757629374 | 0.4220377431880477 | 0.6736559728094998 |
| 0.6736061060953286 | 0.3738459667266654 | 0.5409915624096236 |
| 0.4999046385700438 | 0.5000311130957859 | 0.7584696505743164 |
| 0.3129996694575358 | 0.6359230663121092 | 0.6155452862373656 |
| 0.4346005841371650 | 0.5475063063686235 | 0.7160213806925766 |
| 0.4832171834825136 | 0.6969098722850628 | 0.6189553718919951 |
| 0.3075359131424529 | 0.5448889666267512 | 0.6189442319184965 |
| 0.3978674729809239 | 0.6691985149809445 | 0.6189270052515650 |
| 0.3728696360094906 | 0.5923581754134882 | 0.6688521977406106 |
| 0.2921072915087225 | 0.5923780303764545 | 0.5381467895871994 |

|                    |                    |                    |
|--------------------|--------------------|--------------------|
| 0.3479460731075742 | 0.6691741329663209 | 0.5381333924582008 |
| 0.2853809629554449 | 0.5000274627468259 | 0.5410191595409186 |
| 0.4590084769896412 | 0.6261609159346724 | 0.6736258559573296 |
| 0.4337034550310958 | 0.7041197301703644 | 0.5410115895407185 |
| 0.5714658757981108 | 0.7198401559870378 | 0.6156330059936286 |
| 0.5248922486882327 | 0.5768452071706218 | 0.7160712139017148 |
| 0.5485925906823480 | 0.6494159201972246 | 0.6688834643659619 |
| 0.6138927732744455 | 0.6968946273442267 | 0.5381963755085789 |
| 0.5236256960732889 | 0.7262750210388514 | 0.5381668603494015 |
| 0.6293455918079799 | 0.6493876695997074 | 0.6189994832126067 |
| 0.7224829378803288 | 0.5474130764133258 | 0.5382026461588824 |
| 0.6570969177843978 | 0.4999836133425392 | 0.6689088345923185 |
| 0.6820882755204708 | 0.5768010656256531 | 0.6189789526139912 |
| 0.6736665873302000 | 0.6260885166498987 | 0.5410337578496636 |
| 0.6073200712151908 | 0.5779408195087373 | 0.6736674386935092 |
| 0.3467185695719248 | 0.4999907984129283 | 0.4233602988139683 |
| 0.4526381847733004 | 0.3542165737170949 | 0.4233699399927704 |
| 0.3972802535690418 | 0.4253457031009983 | 0.4215311383032185 |
| 0.4215154449471828 | 0.4999891176035787 | 0.3730154576587862 |
| 0.3580218454254656 | 0.4538645278634851 | 0.5000189529962407 |
| 0.4757503756114739 | 0.4253568726475634 | 0.3730192950519066 |
| 0.4218239847541832 | 0.4999900999401393 | 0.4609189065081619 |
| 0.4758544691108777 | 0.4256494609166569 | 0.4609295442125205 |
| 0.6240064649185852 | 0.4099084261528324 | 0.4233797364461319 |
| 0.5635065127004942 | 0.4538876227290254 | 0.3730333527664005 |
| 0.5392523307073659 | 0.3792351000340320 | 0.4215234068170401 |
| 0.6270032666205847 | 0.5000092961738206 | 0.4215209915232721 |
| 0.5632522892642994 | 0.4540718971172423 | 0.4609269021783488 |
| 0.4526276366207317 | 0.6457735557305017 | 0.4233538013960895 |
| 0.3580219302187226 | 0.5461216018182855 | 0.5000053789874823 |
| 0.4757582953807537 | 0.5746359628427177 | 0.3730141556003735 |
| 0.3972753068429933 | 0.5746253810002167 | 0.4215108118050887 |
| 0.4758450766548802 | 0.5743456430350792 | 0.4609233448852650 |
| 0.5000015952823107 | 0.5000001045333493 | 0.4126154269820828 |
| 0.5000069422727956 | 0.4999936732173703 | 0.3286327367959527 |
| 0.6240021161569865 | 0.5901047866560319 | 0.4233752201300274 |
| 0.5392359084864243 | 0.6207716040450739 | 0.4215200910865204 |
| 0.6419803833822834 | 0.5461404348410110 | 0.5000062786627794 |
| 0.5877339319380083 | 0.6207577273353946 | 0.5000189273712695 |
| 0.5635038852962715 | 0.5461188058064239 | 0.3730197765346676 |
| 0.5632443987670316 | 0.5459430303610638 | 0.4609213230109019 |
| 0.3760017639364599 | 0.4098963163244849 | 0.5766564401858486 |
| 0.3730036118079926 | 0.4999917421498659 | 0.5785178578784729 |
| 0.4607595361516308 | 0.3792257215738114 | 0.5785077788009739 |

|                    |                    |                    |
|--------------------|--------------------|--------------------|
| 0.5000019340575967 | 0.3507135291937576 | 0.5000215779362341 |
| 0.4122710120865632 | 0.3792358248090249 | 0.5000134578272040 |
| 0.4365018890834370 | 0.4538816936004975 | 0.6270012635440960 |
| 0.4367542403620459 | 0.4540587614639741 | 0.5391044152163007 |
| 0.5473716340082603 | 0.3542271912491057 | 0.5766621287851362 |
| 0.5877212840031076 | 0.3792468121379790 | 0.5000130081191118 |
| 0.6419823666762094 | 0.4538799826688147 | 0.5000196112365288 |
| 0.5242438560929606 | 0.4253633528510250 | 0.6270179707950866 |
| 0.6027240488921929 | 0.4253792886102659 | 0.5785004874870636 |
| 0.5241473550864524 | 0.4256587544100437 | 0.5391041705998436 |
| 0.4999970032959946 | 0.5000034663105980 | 0.5874119321165865 |
| 0.3759903551830729 | 0.5900939361905324 | 0.5766417335988379 |
| 0.4122612667635221 | 0.6207530251206136 | 0.5000057008447809 |
| 0.4364975403619258 | 0.5461233548021650 | 0.6269959866903627 |
| 0.4607440316436984 | 0.6207722936435947 | 0.5784844230107102 |
| 0.4999954172366394 | 0.6492903437500234 | 0.4999993834097344 |
| 0.4367484427544917 | 0.5459320149793253 | 0.5390989463756161 |
| 0.6532812273902497 | 0.5000123037234632 | 0.5766671199582548 |
| 0.5473557255568621 | 0.6457916171361973 | 0.5766505066289280 |
| 0.4999941683373753 | 0.5000116260116649 | 0.6713945054536893 |
| 0.6027177576180963 | 0.5746603582216192 | 0.5785059123690455 |
| 0.5784810665140480 | 0.5000064648097199 | 0.6270037191618961 |
| 0.5242445301054197 | 0.5746482902987873 | 0.6270001889665634 |
| 0.499993818788648  | 0.5000023008291163 | 0.5000110164287586 |
| 0.6240021161569865 | 0.5901047866560319 | 0.4233752201300274 |
| 0.6240021161569865 | 0.5901047866560319 | 0.4233752201300274 |
| 0.5392359084864243 | 0.6207716040450739 | 0.4215200910865204 |
| 0.6419803833822834 | 0.5461404348410110 | 0.5000062786627794 |
| 0.5877339319380083 | 0.6207577273353946 | 0.5000189273712695 |
| 0.5635038852962715 | 0.5461188058064239 | 0.3730197765346676 |
| 0.5632443987670316 | 0.5459430303610638 | 0.4609213230109019 |
| 0.3760017639364599 | 0.4098963163244849 | 0.5766564401858486 |
| 0.3730036118079926 | 0.4999917421498659 | 0.5785178578784729 |
| 0.4607595361516308 | 0.3792257215738114 | 0.5785077788009739 |
| 0.5000019340575967 | 0.3507135291937576 | 0.5000215779362341 |
| 0.4122710120865632 | 0.3792358248090249 | 0.5000134578272040 |
| 0.4365018890834370 | 0.4538816936004975 | 0.6270012635440960 |
| 0.4367542403620459 | 0.4540587614639741 | 0.5391044152163007 |
| 0.5473716340082603 | 0.3542271912491057 | 0.5766621287851362 |
| 0.5877212840031076 | 0.3792468121379790 | 0.5000130081191118 |
| 0.6419823666762094 | 0.4538799826688147 | 0.5000196112365288 |
| 0.5242438560929606 | 0.4253633528510250 | 0.6270179707950866 |
| 0.6027240488921929 | 0.4253792886102659 | 0.5785004874870636 |
| 0.5241473550864524 | 0.4256587544100437 | 0.5391041705998436 |



|                    |                    |                    |
|--------------------|--------------------|--------------------|
| 0.4999970032959946 | 0.5000034663105980 | 0.5874119321165865 |
| 0.3759903551830729 | 0.5900939361905324 | 0.5766417335988379 |
| 0.4122612667635221 | 0.6207530251206136 | 0.5000057008447809 |
| 0.4364975403619258 | 0.5461233548021650 | 0.6269959866903627 |
| 0.4607440316436984 | 0.6207722936435947 | 0.5784844230107102 |
| 0.4999954172366394 | 0.6492903437500234 | 0.4999993834097344 |
| 0.4367484427544917 | 0.5459320149793253 | 0.5390989463756161 |
| 0.6532812273902497 | 0.5000123037234632 | 0.5766671199582548 |
| 0.5473557255568621 | 0.6457916171361973 | 0.5766505066289280 |
| 0.4999941683373753 | 0.5000116260116649 | 0.6713945054536893 |
| 0.6027177576180963 | 0.5746603582216192 | 0.5785059123690455 |
| 0.5784810665140480 | 0.5000064648097199 | 0.6270037191618961 |
| 0.5242445301054197 | 0.5746482902987873 | 0.6270001889665634 |
| 0.499993818788648  | 0.5000023008291163 | 0.5000110164287586 |
| 0.5781767809579794 | 0.5000186876935497 | 0.5391043409730689 |
| 0.5241441949538607 | 0.5743539601624060 | 0.5390911717415819 |

POSCAR of Cubo-structure Ir@Pt core-shell nanoparticle

```

1.0000000000000000
 30.0000000000000000    0.0000000000000000    0.0000000000000000
  0.0000000000000000    30.0000000000000000    0.0000000000000000
  0.0000000000000000    0.0000000000000000    30.0000000000000000
Pt      Ir
 92     55
Direct
0.3107599909999976  0.3107700050000020  0.5000000000000000
0.3075999200000001  0.435499959999972  0.3730300069999970
0.3075900079999982  0.3730700019999986  0.4354900120000025
0.3108200129999972  0.5000000000000000  0.3106899859999999
0.4355799849999968  0.3075399899999994  0.3731200100000009
0.3731099959999966  0.3075500129999966  0.4355599880000014
0.4356000129999984  0.3731000129999984  0.3075599969999985
0.3731499909999982  0.4355399909999988  0.3075200019999969
0.3680100139999993  0.3679400090000016  0.3679400090000016
0.5000399950000016  0.3107399940000022  0.3108299969999990
0.5644699930000030  0.3075700099999992  0.3731699880000008
0.4999899860000028  0.3064100149999973  0.4365999999999985
0.5644699930000030  0.3731099959999966  0.3076199890000026
0.5000100139999972  0.4365699889999988  0.3064100149999973
0.5634599919999985  0.5000299809999973  0.3064100149999973
0.6269000169999970  0.3075700099999992  0.4356099959999966
0.6892600059999978  0.3107799889999967  0.5000299809999973
0.6269099710000035  0.4355599880000014  0.3076100050000008
0.6320499779999977  0.3679899870000014  0.3680399949999966
0.6924600010000006  0.4355599880000014  0.3731499909999982
0.6924600010000006  0.3731200100000009  0.4356000129999984
0.6892700200000021  0.4999800029999975  0.3108099999999965
0.6936299799999972  0.5000399950000016  0.4365999999999985
0.3075500129999966  0.5644599880000023  0.3730599880000014
0.3063699900000003  0.4999800029999975  0.4365000129999999
0.3075299859999987  0.6269299980000014  0.4355100100000016
0.3107300100000003  0.6892499920000006  0.4999899860000028
0.4365600049999969  0.5000299809999973  0.3063899870000029
0.3731099959999966  0.5644900200000009  0.3075299859999987
0.4355399909999988  0.6269299980000014  0.3075399989999994
0.3679600059999970  0.6320700050000028  0.3679299949999972
0.4355599880000014  0.6924899819999979  0.3730799849999968
0.3730799849999968  0.6924899819999979  0.4355199929999998
0.4365499909999997  0.6936699749999988  0.4999899860000028
0.5000500080000023  0.6936699749999988  0.4365200100000024

```

|                    |                    |                    |
|--------------------|--------------------|--------------------|
| 0.5000100139999972 | 0.5634800200000001 | 0.3064000010000001 |
| 0.5644900200000009 | 0.6269000169999970 | 0.3075399989999994 |
| 0.5000299809999973 | 0.6892300250000005 | 0.3107300100000003 |
| 0.5645300150000025 | 0.6924300189999997 | 0.3730599880000014 |
| 0.5635100009999974 | 0.6936799879999995 | 0.4999699890000002 |
| 0.6269199850000007 | 0.5644400119999986 | 0.3075599969999985 |
| 0.6924899819999979 | 0.5644500260000029 | 0.3731099959999966 |
| 0.6320899720000028 | 0.6320199970000004 | 0.3679400090000016 |
| 0.692499949999986  | 0.6269000169999970 | 0.4355399909999988 |
| 0.6269800070000002 | 0.6924399729999990 | 0.4354999959999972 |
| 0.6893100140000001 | 0.6892499920000006 | 0.5000000000000000 |
| 0.3063600059999985 | 0.4365299939999971 | 0.4999699890000002 |
| 0.3075200019999969 | 0.3731000129999984 | 0.5644699930000030 |
| 0.3075299859999987 | 0.4355399909999988 | 0.6269400119999986 |
| 0.3063499929999978 | 0.5000000000000000 | 0.5634599919999985 |
| 0.4365299939999971 | 0.3064000010000001 | 0.5000399950000016 |
| 0.3730700019999986 | 0.3075599969999985 | 0.5644900200000009 |
| 0.4355199929999998 | 0.3075500129999966 | 0.6269299980000014 |
| 0.3679400090000016 | 0.3679499919999998 | 0.6320700050000028 |
| 0.4355500039999995 | 0.3730899990000012 | 0.6924899819999979 |
| 0.3730700019999986 | 0.4355399909999988 | 0.6924899819999979 |
| 0.4999800029999975 | 0.3064000010000001 | 0.5634899739999994 |
| 0.5634400249999985 | 0.3064100149999973 | 0.5000600219999995 |
| 0.5644699930000030 | 0.3075500129999966 | 0.6269099710000035 |
| 0.5000100139999972 | 0.3107599909999976 | 0.6892399789999999 |
| 0.5645099879999975 | 0.3730700019999986 | 0.6924399729999990 |
| 0.5000399950000016 | 0.4365299939999971 | 0.6936699749999988 |
| 0.6269099710000035 | 0.3075500129999966 | 0.5644699930000030 |
| 0.6936200259999978 | 0.4365899860000013 | 0.5000600219999995 |
| 0.6924800279999985 | 0.3731099959999966 | 0.5644699930000030 |
| 0.6320800190000000 | 0.3679499919999998 | 0.6320300100000011 |
| 0.692499949999986  | 0.4355599880000014 | 0.6269000169999970 |
| 0.6269800070000002 | 0.4355199929999998 | 0.6924399729999990 |
| 0.6936299799999972 | 0.5000500080000023 | 0.5634899739999994 |
| 0.3063499929999978 | 0.5634599919999985 | 0.4999800029999975 |
| 0.3075099890000033 | 0.5644500260000029 | 0.6269099710000035 |
| 0.3107599909999976 | 0.5000100139999972 | 0.6892899870000022 |
| 0.3075000050000014 | 0.6269000169999970 | 0.5644500260000029 |
| 0.4365499909999997 | 0.5000100139999972 | 0.6936699749999988 |
| 0.3731099959999966 | 0.5644699930000030 | 0.6925100090000029 |
| 0.3730899990000012 | 0.692499949999986  | 0.5644400119999986 |
| 0.4355599880000014 | 0.6925200219999965 | 0.6268900040000034 |
| 0.4355700019999986 | 0.6269299980000014 | 0.6924899819999979 |
| 0.5635100009999974 | 0.4999899860000028 | 0.6936600209999995 |

|                    |                    |                    |
|--------------------|--------------------|--------------------|
| 0.5000200269999979 | 0.5634800200000001 | 0.6936699749999988 |
| 0.5000299809999973 | 0.6936799879999995 | 0.5634499789999978 |
| 0.5644999740000003 | 0.6924999949999986 | 0.6269299980000014 |
| 0.5644900200000009 | 0.6269500260000029 | 0.6924800279999985 |
| 0.5000200269999979 | 0.6893000009999994 | 0.6892399789999999 |
| 0.6936200259999978 | 0.5634999870000001 | 0.5000399950000016 |
| 0.6924999949999986 | 0.5645099879999975 | 0.6269299980000014 |
| 0.6893100140000001 | 0.5000100139999972 | 0.6892200110000033 |
| 0.6269500260000029 | 0.5644800070000002 | 0.6924800279999985 |
| 0.6924899819999979 | 0.6269500260000029 | 0.5644900200000009 |
| 0.6269500260000029 | 0.6925100090000029 | 0.5644599800000023 |
| 0.6320800190000000 | 0.6320700050000028 | 0.6320499779999977 |
| 0.3679499919999998 | 0.6320700050000028 | 0.6320499779999977 |
| 0.4358299969999990 | 0.4358699920000007 | 0.3730199929999998 |
| 0.4358200129999972 | 0.3730199929999998 | 0.4358800050000013 |
| 0.3729799990000018 | 0.4358600079999988 | 0.4358499940000016 |
| 0.3729499880000020 | 0.3729600010000027 | 0.5000200269999979 |
| 0.4356699880000008 | 0.4357100129999978 | 0.5000299809999973 |
| 0.4999899860000028 | 0.3732399940000022 | 0.5000399950000016 |
| 0.5000000000000000 | 0.3729700149999999 | 0.3729900120000025 |
| 0.5641400219999966 | 0.4358899890000032 | 0.3730399909999988 |
| 0.5641400219999966 | 0.3730300069999970 | 0.4359099859999986 |
| 0.4999800029999975 | 0.4357300100000003 | 0.4357399940000022 |
| 0.6270099879999975 | 0.4359000030000004 | 0.4359099859999986 |
| 0.3729700149999999 | 0.5000100139999972 | 0.3729400040000002 |
| 0.4358299969999990 | 0.5641999839999983 | 0.3730100100000016 |
| 0.4356800019999980 | 0.5000299809999973 | 0.4357100129999978 |
| 0.3729799990000018 | 0.5641800169999982 | 0.4358499940000016 |
| 0.3731999990000006 | 0.5000100139999972 | 0.5000000000000000 |
| 0.4358400110000034 | 0.6270499829999991 | 0.4358499940000016 |
| 0.5000000000000000 | 0.5000299809999973 | 0.3732500079999994 |
| 0.5000100139999972 | 0.6270700099999971 | 0.3729499880000020 |
| 0.5641599889999966 | 0.5641999839999983 | 0.3730199929999998 |
| 0.5643000009999994 | 0.5000500080000023 | 0.4357300100000003 |
| 0.5000000000000000 | 0.5643500090000018 | 0.4357100129999978 |
| 0.5000000000000000 | 0.5000299809999973 | 0.5000200269999979 |
| 0.5641800169999982 | 0.6270499829999991 | 0.4358600079999988 |
| 0.6270599959999998 | 0.5000399950000016 | 0.3729900120000025 |
| 0.6270200009999982 | 0.5642099980000026 | 0.4358800050000013 |
| 0.6267899870000022 | 0.5000399950000016 | 0.5000399950000016 |
| 0.4358200129999972 | 0.3730199929999998 | 0.5641999839999983 |
| 0.3729700149999999 | 0.4358699920000007 | 0.5641800169999982 |
| 0.4358299969999990 | 0.4358699920000007 | 0.6270499829999991 |
| 0.3729299900000029 | 0.5000100139999972 | 0.6270899769999971 |

|                    |                    |                    |
|--------------------|--------------------|--------------------|
| 0.4999899860000028 | 0.4357199969999996 | 0.5643500090000018 |
| 0.5000100139999972 | 0.5000200269999979 | 0.6268299819999967 |
| 0.5643000009999994 | 0.4357300100000003 | 0.5000500080000023 |
| 0.5641499760000031 | 0.3730300069999970 | 0.5642099980000026 |
| 0.5000000000000000 | 0.3729600010000027 | 0.6270800229999978 |
| 0.5641700030000010 | 0.4358699920000007 | 0.6270499829999991 |
| 0.6270499829999991 | 0.3729799990000018 | 0.5000600219999995 |
| 0.6270099879999975 | 0.4358800050000013 | 0.5642099980000026 |
| 0.4356800019999980 | 0.5643500090000018 | 0.5000000000000000 |
| 0.4356800019999980 | 0.5000100139999972 | 0.5643399949999974 |
| 0.3729799990000018 | 0.5641700030000010 | 0.5641499760000031 |
| 0.4358600079999988 | 0.5641700030000010 | 0.6270400289999998 |
| 0.4999899860000028 | 0.4357199969999996 | 0.5643500090000018 |
| 0.5000100139999972 | 0.5000200269999979 | 0.6268299819999967 |
| 0.5643000009999994 | 0.4357300100000003 | 0.5000500080000023 |
| 0.5641499760000031 | 0.3730300069999970 | 0.5642099980000026 |
| 0.5000000000000000 | 0.3729600010000027 | 0.6270800229999978 |
| 0.5641700030000010 | 0.4358699920000007 | 0.6270499829999991 |
| 0.6270499829999991 | 0.3729799990000018 | 0.5000600219999995 |
| 0.6270099879999975 | 0.4358800050000013 | 0.5642099980000026 |
| 0.4356800019999980 | 0.5643500090000018 | 0.5000000000000000 |
| 0.4356800019999980 | 0.5000100139999972 | 0.5643399949999974 |
| 0.3729799990000018 | 0.5641700030000010 | 0.5641499760000031 |
| 0.4358600079999988 | 0.5641700030000010 | 0.6270400289999998 |
| 0.3729299900000029 | 0.6270800229999978 | 0.5000000000000000 |
| 0.4358600079999988 | 0.6270400289999998 | 0.5641599889999966 |
| 0.5000100139999972 | 0.6270999910000015 | 0.6270800229999978 |
| 0.5643200279999974 | 0.5643600229999990 | 0.5000299809999973 |
| 0.5643200279999974 | 0.5000399950000016 | 0.5643600229999990 |
| 0.5000200269999979 | 0.5643500090000018 | 0.5643399949999974 |
| 0.5641599889999966 | 0.5641999839999983 | 0.6270400289999998 |
| 0.5000100139999972 | 0.6268299819999967 | 0.5000100139999972 |
| 0.5641700030000010 | 0.6270599959999998 | 0.5641800169999982 |
| 0.6270200009999982 | 0.5642099980000026 | 0.5641999839999983 |
| 0.6270800229999978 | 0.5000299809999973 | 0.6270700099999971 |
| 0.6270800229999978 | 0.6270800229999978 | 0.5000200269999979 |

POSCAR of TCO-structure Ir@Pt core-shell nanoparticle

```

1.0000000000000000
30.0000000000000000 0.0000000000000000 0.0000000000000000
0.0000000000000000 30.0000000000000000 0.0000000000000000
0.0000000000000000 0.0000000000000000 30.0000000000000000

```

```

Pt    Ir
122   79

```

Direct

```

0.3083195644474346 0.3082897502322967 0.5000577364847633
0.3055163324871700 0.4322534093192851 0.3688707648183635
0.3055243094710690 0.3688340935744647 0.4322778443449175
0.2439179547694959 0.4356959611734320 0.4357384439688982
0.2472420475171330 0.5000186402648943 0.3736963892860841
0.4322499939122985 0.3055391593627447 0.3688402310156207
0.4357185750097359 0.2439286849728147 0.4356947375412629
0.3688479159037397 0.3055242665584850 0.4322589726010629
0.3736707656046230 0.2472533763117636 0.5000213792938697
0.4356917972526458 0.4357357911142387 0.2439394507358177
0.4322467633926378 0.3688595142338100 0.3055392868506893
0.3688342703078302 0.4322645671918873 0.3055511757769880
0.3696727438222664 0.3696857553257484 0.3696989812413313
0.3736250948539624 0.5000467605574369 0.2473079731231272
0.5000389345972888 0.3083493873251240 0.3082917823402322
0.5000287913594192 0.2398511005575993 0.4999928020195820
0.5000378221783456 0.2472986779269906 0.3736244445656880
0.5678081171638064 0.3055534265720545 0.3688290538777394
0.5643422165324052 0.2439367318299585 0.4356750594427120
0.5000183067044269 0.3736915444774912 0.2472614704666886
0.5643278189785431 0.4357499761073745 0.2439274871603959
0.5677990656813583 0.3688831312377414 0.3055221253958847
0.6312020044522129 0.3055430631154842 0.4322328194707230
0.6917490491129447 0.3083060038137974 0.5000024993203258
0.6311990289449314 0.4322976192800821 0.3055201589738515
0.6303609599579610 0.3697293946680179 0.3696845909402919
0.6945254423414224 0.4322887756016093 0.3688338153723280
0.6945249675545790 0.3688538639742479 0.4322437754471454
0.6917573241652044 0.5000781392448577 0.3083104257978351
0.7561306156384437 0.4357197193448325 0.4357051781686860
0.7527941266129181 0.3736572986922004 0.5000100979362618
0.3082827104978836 0.5000446386898649 0.3083561791079508
0.3055243958715118 0.5677889490340933 0.3688837152266979
0.2439161000518183 0.5643061426547061 0.4357496234402753
0.3055218517368594 0.6311815175487500 0.4322924226692859

```

|                    |                    |                    |
|--------------------|--------------------|--------------------|
| 0.3082949560470746 | 0.6917261461503530 | 0.5000538574486124 |
| 0.4356897651702149 | 0.5643498046099074 | 0.2439524403462391 |
| 0.3688395715710971 | 0.5678050150290213 | 0.3055648878098918 |
| 0.4322548548333480 | 0.6312003956364614 | 0.3055583024080148 |
| 0.3696949462668728 | 0.6303546292008186 | 0.3697332206814302 |
| 0.4322632852194891 | 0.6945104081881927 | 0.3688725370865598 |
| 0.3688444257350814 | 0.6945088930939765 | 0.4322865721688193 |
| 0.4357147848834926 | 0.7561053668347948 | 0.4357405293675292 |
| 0.5000039354906531 | 0.5000341730176010 | 0.2398564425880600 |
| 0.5000322738468786 | 0.6917530340664677 | 0.3083396605959114 |
| 0.5643217011928261 | 0.5643480889857379 | 0.2439305011173053 |
| 0.5000096122248805 | 0.6263987722908352 | 0.2472918786226875 |
| 0.5677806718880061 | 0.6311959227532401 | 0.3055465667238487 |
| 0.5677859950398180 | 0.6945065212997076 | 0.3688657436629651 |
| 0.5000298393212457 | 0.7527860606763050 | 0.3736914448546980 |
| 0.5643392956876830 | 0.7561085281651300 | 0.4357324435781875 |
| 0.6263906325316434 | 0.5000674035839120 | 0.2472708181033838 |
| 0.6311820077420168 | 0.5678079888243457 | 0.3055440157793466 |
| 0.6945103110278062 | 0.5678040294578636 | 0.3688553679099761 |
| 0.6303410276849053 | 0.6303501590411342 | 0.3697233293795436 |
| 0.6945209073651032 | 0.6311975695328896 | 0.4322829315388348 |
| 0.6311974634077199 | 0.6945115099005755 | 0.4322875009076516 |
| 0.6917542702084030 | 0.6917372749668864 | 0.5000594199913344 |
| 0.7528022839009382 | 0.5000489091747179 | 0.3736670116732733 |
| 0.7561286790689699 | 0.5643390176660247 | 0.4357213518993049 |
| 0.2472735117358304 | 0.3736272956694910 | 0.5000568233455100 |
| 0.3055511495275509 | 0.3688312530798079 | 0.5678063809512397 |
| 0.2439244647974113 | 0.4356778346012141 | 0.5643524667003786 |
| 0.3055396309203387 | 0.4322391916860376 | 0.6311962265176524 |
| 0.2398470979193413 | 0.4999897447128431 | 0.5000355323592195 |
| 0.4357337338856121 | 0.2439142034099131 | 0.5643174926054201 |
| 0.3688696570428520 | 0.3055155835564794 | 0.5677986785273273 |
| 0.4322858779354447 | 0.3055093094794912 | 0.6311942255114787 |
| 0.3697190947292299 | 0.3696748302800240 | 0.6303578614101232 |
| 0.4322848979138806 | 0.3688344466841889 | 0.6945093361024641 |
| 0.3688590552375688 | 0.4322434465679754 | 0.6945051471826375 |
| 0.4357206526553201 | 0.4356909592553883 | 0.7561045728288019 |
| 0.3736648736317277 | 0.5000017299262147 | 0.7527612501974283 |
| 0.5000472468641141 | 0.3736411677163954 | 0.7527676734753564 |
| 0.5000173970800302 | 0.4999979267325215 | 0.7601739927491653 |
| 0.5643373433778895 | 0.2439058200235846 | 0.5643000411324769 |
| 0.5000486605756662 | 0.2472445387545538 | 0.6263712910494155 |
| 0.5678027520393737 | 0.3055239100088800 | 0.6311721194517591 |
| 0.5000665948504083 | 0.3082847268835304 | 0.6917298845064586 |

|                    |                    |                    |
|--------------------|--------------------|--------------------|
| 0.5678037289311315 | 0.3688362107694297 | 0.6944935960086309 |
| 0.5643398123768752 | 0.4357011301328677 | 0.7561054673231534 |
| 0.6263946374458840 | 0.2472679186742720 | 0.4999893414322499 |
| 0.6311955624260778 | 0.3055211139263085 | 0.5677642930177319 |
| 0.6945190319715026 | 0.3688398034164889 | 0.5677675546730248 |
| 0.6303533522343948 | 0.3696972421256312 | 0.6303220373003112 |
| 0.6945243424174062 | 0.4322523798357459 | 0.6311793227345271 |
| 0.6312017189251278 | 0.4322498278700276 | 0.6944984796251197 |
| 0.6917566495560502 | 0.5000144381133597 | 0.6917300643388770 |
| 0.7561265544405863 | 0.4357001277083601 | 0.5643215730540254 |
| 0.2439098973250168 | 0.5643032464855161 | 0.5643320107389922 |
| 0.2472628440137660 | 0.4999971156046129 | 0.6263843449632202 |
| 0.3055270050877318 | 0.5677643042554458 | 0.6311776220958810 |
| 0.3083067046199462 | 0.5000090484288173 | 0.6917297928423112 |
| 0.2472509797951981 | 0.6263689084290307 | 0.5000449808690551 |
| 0.3055342543304398 | 0.6311655212177868 | 0.5677838467048767 |
| 0.3688453619145708 | 0.5677634646605961 | 0.6944919219629836 |
| 0.4357072735704542 | 0.5643091720124788 | 0.7560956300349084 |
| 0.3688507990195684 | 0.6944873161175039 | 0.5677844224660353 |
| 0.3696967091573175 | 0.6303221569927111 | 0.6303331954674188 |
| 0.4322630457390928 | 0.6944860434267901 | 0.6311782472802565 |
| 0.4322560736657596 | 0.6311704195119646 | 0.6944934677387691 |
| 0.3736555866786668 | 0.7527660856332110 | 0.5000384669167810 |
| 0.4357167950616709 | 0.7560938224801510 | 0.5643309319906435 |
| 0.5643275957659843 | 0.5643041027908132 | 0.7561078810081061 |
| 0.5677849077785386 | 0.6944806741875724 | 0.6311846688201322 |
| 0.5677796268893999 | 0.6311638593205877 | 0.6945008716908573 |
| 0.5000254372538602 | 0.6917044987990053 | 0.6917313917313312 |
| 0.5000160880526229 | 0.6263468873213304 | 0.7527633607743726 |
| 0.5000260340897813 | 0.7601620668950132 | 0.5000324904164232 |
| 0.5643373176717358 | 0.7560981963972550 | 0.5643447744371246 |
| 0.5000285876474901 | 0.7527471126120032 | 0.6263819612895293 |
| 0.6945143945578289 | 0.5677620020173236 | 0.6311830863654042 |
| 0.6311857950387459 | 0.5677626783896265 | 0.6945025869193028 |
| 0.6263910013023156 | 0.5000063650568459 | 0.7527641248430555 |
| 0.6945134657497237 | 0.6311744541678864 | 0.5677900686269455 |
| 0.6311874051280794 | 0.6944859562305692 | 0.5677944830096076 |
| 0.6303402747457602 | 0.6303099805739921 | 0.6303351916038381 |
| 0.6263887727633097 | 0.7527689657268266 | 0.5000535712221056 |
| 0.7601886846560348 | 0.5000103502755038 | 0.5000126828051124 |
| 0.7561303732200787 | 0.5643253417255036 | 0.5643331502276020 |
| 0.7528014821754230 | 0.5000096704128212 | 0.6263656797538631 |
| 0.7527955625199990 | 0.6263790047633595 | 0.5000409954232613 |
| 0.4364234450275916 | 0.4364297073796987 | 0.3719524814785100 |



|                    |                    |                    |
|--------------------|--------------------|--------------------|
| 0.4364288267342861 | 0.3719471664051500 | 0.4364202743459468 |
| 0.3719530835247499 | 0.4364147935925807 | 0.4364311249385252 |
| 0.5000267458132678 | 0.3087223398807518 | 0.4361462636150981 |
| 0.5000152589794556 | 0.4361824231909586 | 0.3087204107834818 |
| 0.5000200741769654 | 0.3729844916522136 | 0.3729651881831741 |
| 0.5636136885642005 | 0.4364396382888899 | 0.3719455170468725 |
| 0.5636174642223326 | 0.3719557546237188 | 0.4364124778154234 |
| 0.5000211999818827 | 0.4359617431951823 | 0.4359579254517496 |
| 0.6280937937452061 | 0.4364310302830727 | 0.4364136643245142 |
| 0.3087160818305955 | 0.5000042172399733 | 0.4361794145557717 |
| 0.4361552243238285 | 0.5000301719499098 | 0.3087307887217405 |
| 0.3729698611083846 | 0.5000158183160798 | 0.3729886835397714 |
| 0.4364229262211340 | 0.5636121326331883 | 0.3719629367885583 |
| 0.4359620007327515 | 0.5000127231228776 | 0.4359650206419241 |
| 0.3719461579688667 | 0.5636016969844837 | 0.4364422925614166 |
| 0.4364251760841173 | 0.6280830038411853 | 0.4364400610150231 |
| 0.5000164769450940 | 0.6270661469154135 | 0.3729842807882419 |
| 0.5638708753376082 | 0.5000379335915157 | 0.3087189563843034 |
| 0.5000129242568747 | 0.5638823112281390 | 0.3087262964967458 |
| 0.5000162185654983 | 0.5000265157981661 | 0.3694830994234221 |
| 0.5636059332028882 | 0.5636148500045792 | 0.3719568925796138 |
| 0.5640797106809450 | 0.5000206838545025 | 0.4359592822641405 |
| 0.5000184473322044 | 0.5640740760048336 | 0.4359642775953835 |
| 0.5000237399125897 | 0.5000100984761928 | 0.5000154689577460 |
| 0.5636129974338487 | 0.6280852314814948 | 0.4364351643774902 |
| 0.5000216153656302 | 0.6913151335982423 | 0.4361755223081368 |
| 0.6270681157085259 | 0.5000288666063579 | 0.3729681858360181 |
| 0.6913292655006334 | 0.5000234026638593 | 0.4361539239234714 |
| 0.6280934736136858 | 0.5636122120829211 | 0.4364287750363013 |
| 0.3087190183867502 | 0.4361435389227235 | 0.5000323312698443 |
| 0.3087163264838670 | 0.4999954306470666 | 0.5638825535291196 |
| 0.4361736547298992 | 0.3087109921430964 | 0.5000081238859275 |
| 0.3729834519292635 | 0.3729604055282087 | 0.5000185067019437 |
| 0.4359684237486042 | 0.4359514217554937 | 0.5000161091942916 |
| 0.4364390954961396 | 0.3719341289401573 | 0.5636069972369139 |
| 0.3719599006386953 | 0.4364094494443937 | 0.5636139278719549 |
| 0.4364373551427618 | 0.4364076906418977 | 0.6280797858541440 |
| 0.4359658370504858 | 0.5000032787080085 | 0.5640767537243895 |
| 0.3729787718984094 | 0.4999998933686368 | 0.6270632554634724 |
| 0.4361696215008914 | 0.4999968711665274 | 0.6913138260095895 |
| 0.5638843678140730 | 0.3087145329655613 | 0.4999986976465922 |
| 0.5000356884278200 | 0.3087053088376968 | 0.5638622457172832 |
| 0.5000256364567766 | 0.3694753468418039 | 0.5000077977876424 |
| 0.5640839811800571 | 0.4359586690269756 | 0.5000072236331223 |

|                    |                    |                    |
|--------------------|--------------------|--------------------|
| 0.5636215322337278 | 0.3719434054943838 | 0.5635938657020013 |
| 0.5000292581298332 | 0.4359469957476670 | 0.5640667639618787 |
| 0.5000301888039405 | 0.3729578571891751 | 0.6270531109230287 |
| 0.5636201644124437 | 0.4364145591069658 | 0.6280740660472991 |
| 0.5000308078264251 | 0.4361465663101799 | 0.6913103430269225 |
| 0.5640853700187630 | 0.5000093712806077 | 0.5640686184381168 |
| 0.5000247514652749 | 0.5000019472278406 | 0.6305466950897084 |
| 0.6270720598063629 | 0.3729703572259258 | 0.5000010130328406 |
| 0.6913285902955051 | 0.4361573723233906 | 0.5000073919497032 |
| 0.6280954377787663 | 0.4364202208634729 | 0.5635984503324173 |
| 0.6913289219050157 | 0.5000114686409153 | 0.5638686809753225 |
| 0.3087140350367654 | 0.5638604232534383 | 0.5000364242760306 |
| 0.3694810046727567 | 0.5000045093915760 | 0.5000271460223866 |
| 0.4359605743881600 | 0.5640670366771928 | 0.5000229401058081 |
| 0.3719530785490729 | 0.5635910880241425 | 0.5636137463333565 |
| 0.4364334150831226 | 0.5635901220776008 | 0.6280848664780959 |
| 0.3729720104563671 | 0.6270518921780560 | 0.5000267047522559 |
| 0.4361616312854286 | 0.6913087996323850 | 0.5000290048538369 |
| 0.4364319869574187 | 0.6280709466255131 | 0.5636098302597851 |
| 0.5000219290029846 | 0.5638506306741558 | 0.6913130524761133 |
| 0.6280954377787663 | 0.4364202208634729 | 0.5635984503324173 |
| 0.6913289219050157 | 0.5000114686409153 | 0.5638686809753225 |
| 0.3087140350367654 | 0.5638604232534383 | 0.5000364242760306 |
| 0.3694810046727567 | 0.5000045093915760 | 0.5000271460223866 |
| 0.4359605743881600 | 0.5640670366771928 | 0.5000229401058081 |
| 0.3719530785490729 | 0.5635910880241425 | 0.5636137463333565 |
| 0.4364334150831226 | 0.5635901220776008 | 0.6280848664780959 |
| 0.3729720104563671 | 0.6270518921780560 | 0.5000267047522559 |
| 0.4361616312854286 | 0.6913087996323850 | 0.5000290048538369 |
| 0.4364319869574187 | 0.6280709466255131 | 0.5636098302597851 |
| 0.5000219290029846 | 0.5638506306741558 | 0.6913130524761133 |
| 0.5640819207374096 | 0.5640701415676745 | 0.5000186354916962 |
| 0.5000244990550602 | 0.5640636909523967 | 0.5640743782117740 |
| 0.5636128374931960 | 0.5635929399009952 | 0.6280795083306193 |
| 0.5638809794667433 | 0.5000000702186171 | 0.6913123865454059 |
| 0.5000200078403816 | 0.6305461854559247 | 0.5000216437459126 |
| 0.5638791343302163 | 0.6913129283244939 | 0.5000282291551174 |
| 0.5636109754668205 | 0.6280705858084761 | 0.5636072713524870 |
| 0.5000227861296006 | 0.6913051153593442 | 0.5638755270077940 |
| 0.5000192133638228 | 0.6270456260263103 | 0.6270608782566590 |
| 0.6305620933853456 | 0.5000152472994266 | 0.5000119491705889 |
| 0.6913303929730780 | 0.5638739427409707 | 0.5000212598081464 |
| 0.6280926619033697 | 0.5635983656925730 | 0.5636052423871831 |
| 0.6270730354157351 | 0.5000046907310574 | 0.6270585590015513 |

0.6270706158778913 0.6270606555941920 0.5000224425745494
